# Supplementary material
Source: publisher figshare collection journal article supplement (https://tandf.figshare.com/articles/dataset/_/5598784)
Supplement: Supplementary file 1 [file 2]

## A Supplemental Appendix Section

### Weighted NPMLE for the subdistribution of a competing risk

by Anna Bellach, Michael R Kosorok, Ludger Rüschendorf and Jason P Fine

#### A.1 Model conditions

- M1) The cumulative baseline  $A_0(t)$  is a strictly increasing and continuously differentiable function and  $\beta_0$  lies in the interior of a compact set  $\mathcal{C}$ .
- M2) The vector of covariates  $Z(t)$  is  $P$ -almost surely of bounded variation on the observed interval  $[0, \tau]$ .
- M3) The endpoint of the study  $\tau$  is chosen in a way that  $P$ -almost surely there exists a constant  $\delta > 0$  such that  $P(C \geq \tau|Z) > \delta$  and  $P(X \geq \tau|Z) > \delta$ .
- M4)  $\mathcal{G}$  is a thrice continuously differentiable and strictly increasing function with  $\mathcal{G}(0) = 0$ ,  $\mathcal{G}'(0) > 0$  and  $\mathcal{G}(\infty) = \infty$ . In addition to that one of the following conditions is required:
- a)  $\mathcal{G}''(x) \leq 0$  for  $x > 0$  or
  - b)  $\mathcal{G}''(x) \geq 0$  for  $x > 0$ . In addition to that for any  $a \in (0, \infty)$  and for any sequence  $(x_n) \subset \mathbb{R}$  with  $x_n \rightarrow \infty$  as  $n \rightarrow \infty$ ,
- $$(*) \quad \lim_{n \rightarrow \infty} \mathbb{P}(X \leq \tau, \Delta\varepsilon = 1) \left[ \frac{\log(ax_n)}{\mathcal{G}(a^{-1}x_n)} + \frac{\log \mathcal{G}'(ax_n)}{\mathcal{G}(a^{-1}x_n)} \right] < P(X \geq \tau).$$
- M5) *Identifiability condition:* If  $h_1 \in \mathbb{R}^d$  and  $h_2 \in \mathcal{D}[0, \tau]$  exist such that  $h_1^T Z(t) + h_2(t) = 0$   $P$ -almost surely, then  $h_1 = 0$  and  $h_2(t) = 0 \ \forall t \in [0, \tau]$ .
- M6) For any  $h_1 \in \mathbb{R}^d$  and for any  $h_2 \in \mathcal{D}[0, \tau]$  exists a subset  $\mathcal{S} \subset [0, \tau]$  of nonzero Lebesgue measure such that  $\forall t \in \mathcal{S}$

$$h_1^T Z(t) + h_2(t) \neq - \frac{\mathcal{G}'' \left( \int_0^t e^{\beta_0^T Z(u)} dA_0(u) \right)}{\mathcal{G}' \left( \int_0^t e^{\beta_0^T Z(u)} dA_0(u) \right)} \int_0^t e^{\beta^T Z(u)} (h_1^T Z(u) + h_2(u)) dA_0(u).$$

For the consistency of the weighted NPMLE, model conditions M1)-M5) and twice continuous differentiability of  $\mathcal{G}$  are sufficient. Model conditions M1)-M2), M5)-M6) and thrice continuous differentiability of  $\mathcal{G}$  are sufficient to obtain weak convergence. For the proportional hazards (Fine-Gray) model conditions M5) and M6) are equivalent. Condition M4a) is satisfied for example for the class of logarithmic transformation models and for the Box-Cox transformation models with  $\rho \in [0, 1]$ . M4b) holds for the Box-Cox transformation models with  $\rho > 1$ . It is sufficient for (\*) to prove that  $\log(ax_n)/\mathcal{G}(a^{-1}x_n) \rightarrow 0$  and  $\log \mathcal{G}'(ax_n)/\mathcal{G}(a^{-1}x_n) \rightarrow 0$  for  $x_n \rightarrow \infty$ .

## A.2 Consistency

We show that  $\hat{A}_n^0(\tau)$  is bounded  $P$ -almost surely, thereby ascertaining the existence of the weighted NPMLE. Then  $\hat{A}_n^0(t)$  is bounded on  $[0, \tau]$  uniformly  $P$ -almost surely. From Helly's selection theorem it is then obtained that  $\exists n_k \subset \mathbb{N} : \hat{A}_{n_k}^0 \xrightarrow{*} A^*$ , for a limit  $A^*$ , with  $*$  denoting outer almost sure convergence. With a Kullback-Leibler argument it is ascertained that every subsequence  $(\hat{\beta}_{n_k}, \hat{A}_{n_k}^0)$  converges to the true parameter  $(\beta_0, A_0)$ .  $\hat{A}_n(t)$  is a sequence of monotone increasing functions, and the limit  $A_0(t)$  is continuous. From this  $\|\hat{A}_n - A_0\|_{\ell^\infty[0, \tau]} \rightarrow 0 [P]$  and  $|\hat{\beta}_n - \beta_0| \rightarrow 0 [P]$  where  $\ell^\infty[0, \tau]$  denotes the space of bounded functions on  $[0, \tau]$ .

*Existence of  $(\hat{\beta}_n, \hat{A}_n^0)$  and boundedness of  $\hat{A}_n^0(\tau)$  under model condition M4a).* We define  $\tilde{A}_n^0(t) := n^{-1} \sum_{i=1}^n N_i(t)$ . By Jensen's inequality it is ascertained that

$$\begin{aligned} & n^{-1} [\ell(\hat{A}_n^0, \hat{\beta}_n) - \ell(\tilde{A}_n^0, \beta_0)] \\ & \leq \left[ \mathbb{P}_n \mathbf{1}\{X \leq \tau, \Delta\varepsilon = 1\} \frac{\log \mathcal{G}(e^{-M} \hat{A}_n^0(\tau))}{\mathcal{G}(e^{-M} \hat{A}_n^0(\tau))} - \mathbb{P}_n \mathbf{1}\{X \geq \tau\} \right] \mathcal{G}(e^{-M} \hat{A}_n^0(\tau)) + O_p(1). \end{aligned}$$

Existence of  $(\hat{\beta}_n, \hat{A}_n^0)$  and boundedness of  $\hat{A}_n^0(\tau)$  under model condition M4b).

$$n^{-1}[\ell(\hat{A}_n^0, \hat{\beta}_n) - \ell(\hat{A}_n^0, \beta_0)] \\ \leq \left\{ \mathbb{P}_n \mathbf{1}\{X \leq \tau, \Delta\varepsilon = 1\} \left[ \frac{\log \mathcal{G}'(e^M \hat{A}_n^0(\tau))}{\mathcal{G}(e^{-M} \hat{A}_n^0(\tau))} + \frac{\log(e^M \hat{A}_n^0(\tau))}{\mathcal{G}(e^{-M} \hat{A}_n^0(\tau))} \right] - \mathbb{P}_n \mathbf{1}\{X \geq \tau\} \right\} \\ \times \mathcal{G}(e^{-M} \hat{A}_n^0(\tau)) + O_p(1).$$

The conclusion in both cases is that if  $\hat{A}_n^0(\tau)$  became infinitely large, the right hand side would go to  $-\infty$ , which contradicts the definition of  $(\hat{A}_n, \hat{\beta}_n)$  as a maximum likelihood estimator.

*Competing risks setting with administrative censoring.* From differentiating the discretized log-likelihood with respect to jump sizes we obtain

$$\hat{A}_n^0(t) = \sum_{i: X_i \leq t, \Delta_i \varepsilon_i = 1} \left[ n \cdot \Phi_n^a(X_i, \hat{A}_n^0, \hat{\beta}_n) \right]^{-1} = \int_0^t \frac{\frac{1}{n} \sum_{i=1}^n \mathbf{1}(C_i \geq s) dN_i(s)}{|\Phi_n^a(s, \hat{A}_n^0, \hat{\beta}_n)|},$$

with  $\Phi_n^a(s, \hat{A}_n^0, \hat{\beta}_n)$  as provided in our technical report. Substituting estimated parameters by the true model parameters we obtain

$$\tilde{A}_n^a(t) = \int_0^t \frac{\frac{1}{n} \sum_{i=1}^n \mathbf{1}(C_i \geq s) dN_i(s)}{|\tilde{\Phi}_n^a(s, A_0, \beta_0)|},$$

and by Doob decomposition of the counting process  $N_i(t)$

$$\tilde{\Phi}_n^a(s, \beta_0, A_0) = \frac{1}{n} \sum_{i=1}^n \mathbf{1}(C_i \geq s) Y_i(s) e^{\beta_0^T Z_i(s)} \mathcal{G}' \left( \int_0^s e^{\beta_0^T Z_i(u)} dA_0(u) \right) + o_p(1).$$

By the Glivenko-Cantelli theorem  $\tilde{\Phi}_n^a(s, \beta_0, A_0)$  converges uniformly to  $E[\eta(s, \beta_0, A_0)]$

with

$$\eta(s, \beta_0, A_0) \equiv \mathbf{1}(C \geq s) Y(s) e^{\beta_0^T Z(s)} \mathcal{G}' \left( \int_0^s Y(u) e^{\beta_0^T Z(u)} dA_0(u) \right)$$

and another application of Doob decomposition implies

$$\tilde{A}_n^a(t) = A_0(t) + n^{-1} \sum_{i=1}^n \int_0^t \frac{\mathbf{1}(C_i \geq s) dM_i(s)}{E[\eta(s, \beta_0, A_0)] + o_p(1)} + o_p(1).$$

By the Glivenko-Cantelli theorem  $\tilde{A}_n^a(t) \rightarrow A_0(t)$  for  $n \rightarrow \infty$  uniformly almost surely in  $t$ . Further the Glivenko-Cantelli theorem implies that  $\Phi_n^a(s, \hat{A}_n^0, \hat{\beta}_n)$  converges uniformly to a continuously differentiable function  $\Phi_*(s, A_*, \beta_*)$  and the limit is bounded away from zero.  $\hat{A}_n^0(t)$  is absolutely continuous with respect  $\tilde{A}_n^a(t)$  and  $\hat{A}_n^0(t)/\tilde{A}_n^a(t)$  converges to  $\alpha_*(t) = E[\eta(s, \beta_0, A_0)]/\Phi_*(s, A_*, \beta_*)$ . Therefore,

$$\hat{A}_n^0(t) \rightarrow A_*(t) = \int_0^t \frac{E[\eta(s, \beta_0, A_0)]}{\Phi_*(s, A_*, \beta_*)} dA_0(s).$$

With a Kullback-Leibler argument it is then obtained that the limit  $A_*(t)$  is  $P$ -almost surely the true baseline hazard  $A_0(t)$ . For the setting with administrative censoring we define the Kullback-Leibler distance

$$\mathcal{K}_a(\theta_0, \theta_*) = E_{F_{\theta_0, G}} \left[ \log \left\{ \left( \frac{f_{\theta_0}(X)}{f_{\theta_*}(X)} \right)^{\Delta \mathbb{1}(\varepsilon=1)} \left( \frac{S_{\theta_0}(C \wedge \tau)}{S_{\theta_*}(C \wedge \tau)} \right)^{1-\Delta} \left( \frac{S_{\theta_0}(C \wedge \tau)}{S_{\theta_*}(C \wedge \tau)} \right)^{\Delta \mathbb{1}(\varepsilon \neq 1)} \right\} \right],$$

thereby denoting  $\theta_0 = (\beta_0, A_0)$  and  $\theta_* = (\beta_*, A_*)$  and with  $f_\theta(t) = \alpha_\theta(t)S_\theta(t)$  being the subdensity for the event of interest. As derived in Section B.3 this Kullback-Leibler distance is nonnegative. On the other hand, as  $\hat{\theta}_n = (\hat{\beta}_n, \hat{A}_n^0(t))$  maximizes the log-likelihood function it is obtained that  $\mathcal{K}_a(\theta_0, \theta_*) \leq 0$  and thus  $\mathcal{K}_a(\theta_0, \theta_*) = 0$ . It is then ascertained in Section B.3 of our technical report that the Kullback-Leibler distance takes the value zero if and only if  $\beta_* = \beta_0$  and  $A_* = A_0$ . From this we conclude that  $\hat{\beta}_n \rightarrow \beta_0$   $P$ -almost surely and  $\hat{A}_n^0 \rightarrow A_0$  uniformly  $P$ -almost surely.

### *Competing risks setting with independent right censoring*

From maximizing the discretized likelihood function we obtain

$$\hat{A}_n^0(t) = \sum_{i: X_i \leq t, \Delta_i \varepsilon_i = 1} \left[ n \cdot \Phi_n(X_i, \hat{A}_n^0, \hat{\beta}_n) \right]^{-1} = \int_0^t \frac{\frac{1}{n} \sum_{i=1}^n \mathbb{1}(C_i \geq s) dN_i(s)}{|\Phi_n(s, \hat{A}_n^0, \hat{\beta}_n)|},$$

with  $\Phi_n(s, \hat{A}_n^0, \hat{\beta}_n)$  as provided in our technical report. Substituting estimated parameters by the true model parameters we define

$$\tilde{A}_n^0(t) = \int_0^t \frac{\frac{1}{n} \sum_{i=1}^n \mathbb{1}(C_i \geq s) dN_i(s)}{|\tilde{\Phi}_n(s, A_0, \beta_0)|}.$$

With an application of empirical process theory it is ascertained that  $\tilde{\Phi}_n(s, \beta_0, A_0) = \tilde{\Phi}_n^a(s, \beta_0, A_0) + o_p(1)$  and thus  $\tilde{A}_n(t) \rightarrow A_0(t)$ . By the Glivenko-Cantelli theorem  $\Phi_n(s, \hat{\beta}_n, \hat{A}_n)$  converges uniformly to a continuously differentiable function  $\Phi^*(s, A^*, \beta^*)$  with  $\Phi^*(s, A^*, \beta^*) > 0$  for  $s \in [0, \tau]$  and

$$\hat{A}_n^0(t) \rightarrow A_*(t) = \int_0^t \frac{E[\eta(s, \beta_0, A_0)]}{\Phi^*(s, \beta^*, A^*)} dA_0(s).$$

$A^*(t)$  is absolutely continuous with respect to the Lebesgue measure and the Radon-Nikodym derivative takes the form  $\alpha^*(t) = E[\eta(t, \beta_0, A_0)] / \Phi^*(t, \beta^*, A^*) \alpha_0(t)$ .

We define the Kullback-Leibler distance corresponding to the weighted log-likelihood function as

$$\begin{aligned} \mathcal{K}_{w^*}(\theta_0, \theta_*) = E_{F_{\theta_0}, G} \left[ \log \left\{ \left( \frac{f_{\theta_0}(X)}{f_{\theta_*}(X)} \right)^{\Delta \mathbb{1}(\varepsilon=1)} \left( \frac{S_{\theta_0}(C \wedge \tau)}{S_{\theta_*}(C \wedge \tau)} \right)^{1-\Delta} \right. \right. \\ \left. \left. \times \left( \frac{\exp(-\int_0^\tau \tilde{w}(t) dA_{\theta_0}(t))}{\exp(-\int_0^\tau \tilde{w}(t) dA_{\theta_*}(t))} \right)^{\Delta \mathbb{1}(\varepsilon \neq 1)} \right\} \right]. \end{aligned}$$

From the asymptotic equivalence of  $\mathcal{K}_a(\theta_0, \theta_*)$  and  $\mathcal{K}_{w^*}(\theta_0, \theta_*)$  it can be concluded that  $\beta_* = \beta_0$  and  $A_* = A_0$ .

### A.3 Weak convergence

Let  $\mathcal{H}$  denote the space of elements  $h = (h_1, h_2)$  with  $h_1 \in \mathbb{R}^d$  and  $h_2 \in \mathcal{D}[0, \tau]$ . A norm on  $\mathcal{H}$  is then defined by  $\|h\|_{\mathcal{H}} = \|h_1\| + \|h_2\|_v$ , with  $\|\cdot\|$  denoting the Euclidean norm and  $\|\cdot\|_v$  denoting the total variation norm. For  $p < \infty$  we define  $\mathcal{H}_p = \{h \in \mathcal{H} : \|h\|_{\mathcal{H}} \leq p\}$ . The parameter space is denoted by  $\Theta = \{\theta = (\beta, A_0), \text{ with } \beta \in \mathbb{R}^d \text{ and } A_0 \text{ being a monotone increasing element of } \mathcal{D}[0, \tau]\}$ . For  $h \in \mathcal{H}_p$  we define  $\theta(h) = h_1^T \beta + \int_0^\tau h_2(u) dA_0(u)$ , so that  $\Theta \subset \ell^\infty(\mathcal{H}_p)$ . One-dimensional submodels of

the form  $t \rightarrow \theta_t = \theta + t(h_1, \int_0^{(\cdot)} h_2(u) dA_0(u))$  are considered with  $h \in \mathcal{H}_p$  to define the empirical score operator

$$\Psi_n(\theta, h, w) = \frac{\partial}{\partial t} \ell_n(\theta_t, h, w) \Big|_{t=0} = \mathbb{P}_n \psi(\theta, h, w) = \mathbb{P}_n(\psi_1(\theta, h, w) + \psi_2(\theta, h, w)),$$

for a measurable function  $\psi(\theta, h, w)$ , where  $\Psi_{n1}^w(\theta, h, w) = \mathbb{P}_n \psi_1(\theta, h, w)$  is the component related to the derivative with regard to  $\beta$  and  $\Psi_{n2}^w(\theta, h, w) = \mathbb{P}_n \psi_2(\theta, h, w)$  is the component related to the derivative along the submodel for  $A_0$ . The limiting version  $\Psi$  is defined by replacing the empirical measure  $\mathbb{P}_n$  by the probability measure  $\mathcal{P}$ .

Weak convergence is ascertained by a new lemma for weighted  $\mathcal{Z}$ -estimators, that is based on Theorem 3.3.1. of van der Vaart and Wellner (1996):

**Lemma 1.** *Let the parameter set  $\Theta$  be a subset of a Banach space. Let  $\tilde{w}(t)$  be a bounded deterministic weight function and let  $\hat{w}_n(t)$  be a sequence of bounded random weight functions with values in  $\mathbb{R}_+$ . Let  $\Psi_n$  and  $\Psi$  be a linear random map and a linear deterministic map, respectively from  $\Theta \times \mathbb{R}_+$  into a Banach space such that*

$$a) \quad \sqrt{n}(\Psi_n - \Psi)(\hat{\theta}_n, \hat{w}_n) - \sqrt{n}(\Psi_n - \Psi)(\theta_0, \hat{w}_n) = o_p^*(1 + \sqrt{n}\|\hat{\theta}_n - \theta_0\|),$$

*such that  $\sqrt{n}(\Psi_n - \Psi)(\theta_0, \tilde{w})$  converges to a tight limit  $\mathcal{Z}_1$  and  $\sqrt{n}((\Psi_n - \Psi)(\theta_0, \hat{w}_n) - (\Psi_n - \Psi)(\theta_0, \tilde{w}))$  converges to a tight limit  $\mathcal{Z}_2$ , and the sequences jointly converge to  $(\mathcal{Z}_1, \mathcal{Z}_2)$ .*

*Let  $(\theta, w) \rightarrow \Psi(\theta, w)$  be Fréchet-differentiable at  $(\theta_0, \tilde{w})$  with a continuously invertible derivative  $\dot{\Psi}_{\theta_0}^{\tilde{w}}$ . If  $\Psi(\theta_0, \tilde{w}) = 0$  and  $\hat{\theta}_n$  satisfies  $\Psi_n(\hat{\theta}_n, \hat{w}_n) = o_p^*(n^{-1/2})$ , if  $\Psi_n(\hat{\theta}_n, \tilde{w}) = \Psi_n(\hat{\theta}_n, \hat{w}_n) + o_p(1)$  and if  $\Psi_n(\hat{\theta}_n, \tilde{w})$  converges in outer probability to  $\Psi(\theta_0, \tilde{w})$ , then*

$$\sqrt{n} \dot{\Psi}_{\theta_0}^{\tilde{w}}(\hat{\theta}_n - \theta_0) = -\sqrt{n}((\Psi_n - \Psi)(\theta_0, \tilde{w}) + (\Psi_n - \Psi)(\theta_0, \hat{w}) - (\Psi_n - \Psi)(\theta_0, \tilde{w})) + o_p^*(1) \quad (1)$$

*and  $\sqrt{n}(\hat{\theta}_n - \theta_0) \rightsquigarrow -[\dot{\Psi}_{\theta_0}^{\tilde{w}}]^{-1}(\mathcal{Z}_1 + \mathcal{Z}_2)$ , with  $\rightsquigarrow$  denoting weak convergence.*

As our model is based on iid observations, for condition a) in the above Lemma 1 it is sufficient to verify the two conditions of Lemma 5 in our technical report. By the Donsker theorem  $\sqrt{n}(\Psi_n - \Psi)(\theta_0, \tilde{w})$  converges in distribution to the tight random element  $\mathcal{Z}_1$ . Also by Donsker theorem  $\sqrt{n}((\Psi_n - \Psi)(\theta_0, \hat{w}_n) - (\Psi_n - \Psi)(\theta_0, \tilde{w}))$  converges in distribution to a tight random element  $\mathcal{Z}_2$ . Joint convergence follows from the asymptotic linearity of the two components marginally, combined with the fact that the composition of two Donsker classes is also Donsker. Per definition  $\Psi_n(\hat{\theta}_n, \hat{w}_n) = 0$ . As argued in Parner (1998) from the Kullback-Leibler information being positive and by interchanging expectation and differentiation we obtain  $\Psi(\theta_0, \tilde{w}) = 0$ . Arguments for the continuous invertibility of  $\dot{\Psi}_0$  and  $\dot{\Psi}_0^a$  under model conditions  $M6), M7)$  are provided in our technical report.

From Lemma 1 we obtain weak convergence of  $\sqrt{n}(\hat{\theta}_n - \theta_0)$  and the covariances for the limiting process  $-\dot{\Psi}_0^{-1}(\mathcal{Z}_1 + \mathcal{Z}_2)$ , with  $\mathcal{Z}_1(h) = \lim_{n \rightarrow \infty} \mathbb{P}_n \psi(\hat{\beta}_n, \hat{A}_n, h, \tilde{w})$  and  $\mathcal{Z}_2(h) = \lim_{n \rightarrow \infty} \mathbb{P}_n [\psi(\hat{\beta}_n, \hat{A}_n, h, \hat{w}_n) - \psi(\hat{\beta}_n, \hat{A}_n, h, \tilde{w})]$ , are given by

$$\mathcal{P} \left\{ \left[ (\mathcal{Z}_1 + \mathcal{Z}_2)(\dot{\Psi}_0^{-1}(g)) \right] \left[ (\mathcal{Z}_1 + \mathcal{Z}_2)(\dot{\Psi}_0^{-1}(h)) \right] \right\}$$

for  $g, h \in \mathcal{H}$  (Kosorok, 2008, page 302).

#### A.4 Variance estimation

The middle part of the sandwich variance estimator, as proposed in section ??, is obtained from the iid decomposition of the score with  $\eta_{i,n} = (\eta_i^1, \dots, \eta_i^{d+k(n)})$  and  $\psi_{i,n} = (\psi_i^1, \dots, \psi_i^{d+k(n)})$  defined as

$$\eta_{i,n}^\ell = \left[ Z_{i\ell}(X_i) + \sum_{\substack{j: X_j \leq X_i \\ \Delta_j \varepsilon_j = 1}} Z_{i\ell}(X_j) e^{\beta^T Z_i(X_j)} A_n\{X_j\} \frac{\mathcal{G}'' \left( \int_0^{X_i} e^{\beta_0^T Z_i(u)} dA_n(u) \right)}{\mathcal{G}' \left( \int_0^{X_i} e^{\beta^T Z_i(u)} dA_n(u) \right)} \right] \mathbb{1}(\Delta_i \varepsilon_i = 1)$$

$$\begin{aligned}
& - \sum_{\substack{j: X_j \leq X_i \wedge \tau \\ \Delta_j \varepsilon_j = 1}} Z_{i\ell}(X_j) e^{\beta^T Z_i(X_j)} A_n\{X_j\} \mathcal{G}' \left( \int_0^{X_i \wedge \tau} e^{\beta^T Z_i(u)} dA_n(u) \right) \\
& - \left[ \int_{X_i}^{\tau} \tilde{w}_i^*(t) e^{\beta^T Z_i(t)} Z_{i\ell}(t) \mathcal{G}' \left( \int_0^t e^{\beta^T Z_i(u)} dA_n(u) \right) dA_n(t) \right] \mathbb{1}(\Delta_i \varepsilon_i = 2) \\
& - \left[ \int_{X_i}^{\tau} \tilde{w}_i^*(t) e^{\beta^T Z_i(t)} \left( \int_0^t Z_{i\ell}(u) e^{\beta^T Z_i(u)} dA_n(u) \right) \mathcal{G}'' \left( \int_0^t e^{\beta^T Z_i(u)} dA_n(u) \right) dA_n(t) \right] \\
& \quad \times \mathbb{1}(\Delta_i \varepsilon_i = 2)
\end{aligned}$$

for  $\ell \in \{1, \dots, d\}$  and

$$\begin{aligned}
\eta_{i,n}^\ell = & \left[ \mathbb{1}(X_\ell = X_i) [A_n\{X_\ell\}]^{-1} + \mathbb{1}(X_\ell \leq (X_i \wedge \tau)) e^{\beta^T Z_i(X_\ell)} \right. \\
& \times \mathcal{G}'' \left( \int_0^{X_i} e^{\beta^T Z_i(u)} dA_n(u) \right) / \mathcal{G}' \left( \int_0^{X_i} e^{\beta^T Z_i(u)} dA_n(u) \right) \left. \right] \mathbb{1}(\Delta_i \varepsilon_i = 1) \\
& - \mathbb{1}(X_\ell \leq (X_i \wedge \tau)) e^{\beta^T Z_i(X_\ell)} \mathcal{G}' \left( \int_0^{X_\ell} e^{\beta^T Z_i(u)} dA_n(u) \right) \\
& - \mathbb{1}(X_i \leq X_\ell) \left[ \tilde{w}_i^*(X_\ell) e^{\beta^T Z_i(X_\ell)} \mathcal{G}' \left( \int_0^{X_\ell} e^{\beta^T Z_i(u)} dA_n(u) \right) \right] \mathbb{1}(\Delta_i \varepsilon_i = 2) \\
& - \left[ e^{\beta^T Z_i(X_\ell)} \int_{X_i \wedge X_\ell}^{\tau} \tilde{w}_i^*(t) e^{\beta^T Z_i(t)} \mathcal{G}'' \left( \int_0^t e^{\beta^T Z_i(u)} dA_n(u) \right) dA_n(t) \right] \mathbb{1}(\Delta_i \varepsilon_i = 2)
\end{aligned}$$

for  $\ell \in \{d+1, \dots, d+k(n)\}$ . To calculate  $\psi_{i,n}^\ell$  we apply

$$\frac{\widehat{G}_c(t)}{\widehat{G}_c(X_j)} - \frac{G_c(t)}{G_c(X_j)} = - \frac{G_c(t)}{G_c(X_j)} \sum_{i=1}^n \int_{X_j}^t \frac{1}{\sum_{k=1}^n \mathbb{1}(X_k \geq u)} \times dM_i^c(u) + o_p(n^{-1/2}),$$

where  $M_i^c(t) = \mathbb{1}(X_i \leq t, \Delta_i = 0) - \int_0^t \mathbb{1}(X_i \geq u) dA^c(u)$  is the martingale associated with the censoring process and  $A^c(t)$  is the cumulative hazard of the censoring distribution. From this we obtain the representation

$$\psi_{i,n}^\ell = \int_0^\infty q_n^\ell(u) \{\pi_n(u)\}^{-1} dM_i^c(u), \text{ with}$$



$$\begin{aligned}
q_n^\ell(u) &= \frac{1}{n} \sum_{j:\Delta_j\varepsilon_j=2} \left[ \int_0^\tau \tilde{w}_j^*(t) \mathbb{1}(X_j \leq u \leq t) e^{\beta^T Z_j(t)} Z_{j\ell}(t) \mathcal{G}' \left( \int_0^t e^{\beta^T Z_j(s)} dA_n(s) \right) dA_n(t) \right] \\
&\quad + \frac{1}{n} \sum_{j:\Delta_j\varepsilon_j=2} \left[ \int_0^\tau \tilde{w}_j^*(t) \mathbb{1}(X_j \leq u \leq t) e^{\beta^T Z_j(t)} \left( \int_0^t Z_{j\ell}(s) e^{\beta^T Z_j(s)} dA_n(s) \right) \right. \\
&\quad \left. \times \mathcal{G}'' \left( \int_0^t e^{\beta^T Z_j(s)} dA_n(s) \right) dA_n(t) \right] \text{ for } \ell \in \{1, \dots, d\},
\end{aligned}$$

$$\begin{aligned}
q_n^\ell(u) &= \frac{1}{n} \sum_{j:\Delta_j\varepsilon_j=2} \left[ \tilde{w}_j^*(X_\ell) \mathbb{1}(X_j \leq u \leq X_\ell) e^{\beta^T Z_j(X_\ell)} \mathcal{G}' \left( \int_0^{X_\ell} e^{\beta^T Z_j(s)} dA_n(s) \right) \right] \\
&\quad + \frac{1}{n} \sum_{j:\Delta_j\varepsilon_j=2} \left[ e^{\beta^T Z_j(X_\ell)} \int_0^\tau \mathbb{1}(X_\ell \leq t) \mathbb{1}(X_j \leq u \leq t) \tilde{w}_j^*(t) e^{\beta^T Z_j(t)} \mathcal{G}'' \left( \int_0^t e^{\beta^T Z_j(s)} dA_n(s) \right) dA_n(t) \right]
\end{aligned}$$

for  $\ell \in \{d+1, \dots, d+k(n)\}$  and  $\pi_n(u) = n^{-1} \sum_{j=1}^n \mathbb{1}(X_j \geq u)$ .
